# Supplementary material for: An Inverted Perovskite Solar Cell with Good Comprehensive Performance Realized by Reducing the Concentration of Precursors
Source: Nanomaterials (Basel). 2022 May 19;12(10):1736. doi: 10.3390/nano12101736 (PMC9147920; doi:10.3390/nano12101736)
Supplement: Supplementary file 1 [file nanomaterials-12-01736-s001.zip › nanomaterials-1718465-supplementary.pdf]

# An Inverted Perovskite Solar Cell with Good Comprehensive Performance Realized by Reducing the Concentration of Precursors

Lijia Chen <sup>1,\*†</sup>, Cunyun Xu <sup>2,†</sup>, Yan Qin <sup>3</sup>, Xiaofeng He <sup>2</sup>, Hongyu Bian <sup>2</sup>, Gaobo Xu <sup>2</sup>, Lianbin Niu <sup>1</sup>  
and Qunliang Song <sup>2,\*</sup>

- <sup>1</sup> College of Physics and Electronic Engineering, Chongqing Normal University, Chongqing 401331, China; niulb03@126.com
- <sup>2</sup> Institute for Clean Energy and Advanced Materials, School of Materials and Energy, Southwest University, Chongqing 400715, China; cyxuamos@foxmail.com (C.X.); hexf1992@163.com (X.H.); samuelhbian@163.com (H.B.); gbxu1805@163.com (G.X.)
- <sup>3</sup> Foundation Department, Army Logistics Academy, Chongqing 401331, China; qy.yfds@foxmail.com
- \* Correspondence: ljchen01@cqnu.edu.cn (L.C.); qlsong@swu.edu.cn (Q.S.)
- † These authors contributed equally to this work.

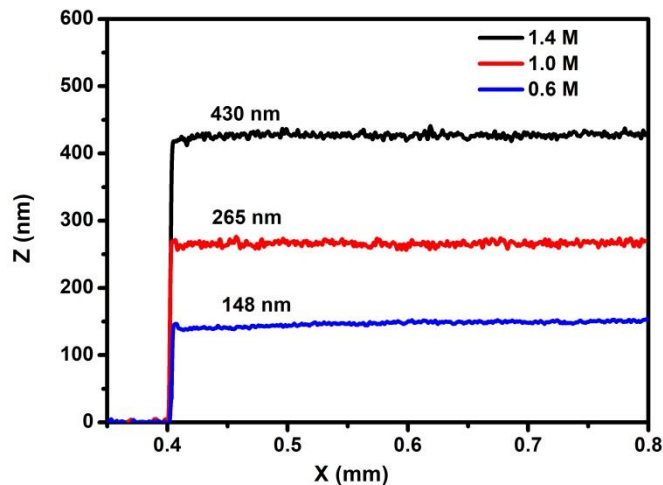

**Figure S1.** The thicknesses of perovskite films with different concentrations (1.4 M, 1.0 M and 0.6 M) of perovskite precursor. All the perovskite films were directly coated on ITO substrates.

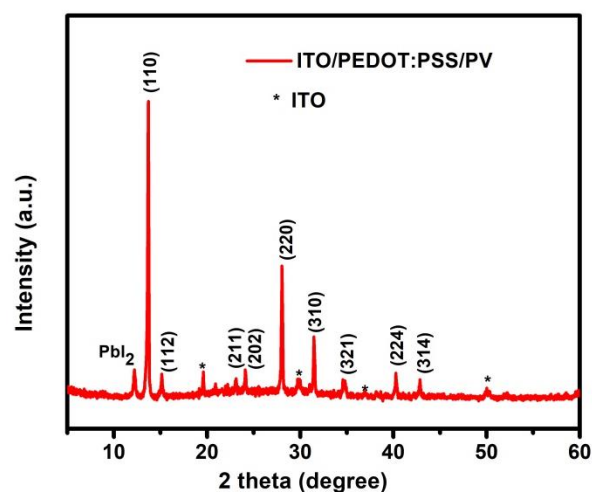

**Figure S2.** XRD spectra of perovskite film prepared by 1 M precursor coated on ITO/PEDOT:PSS film.

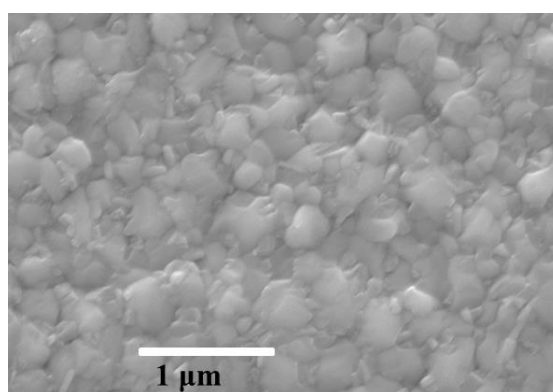

**Figure S3:** SEM image of perovskite film prepared by 1 M precursor coated on ITO/PEDOT:PSS substrate.

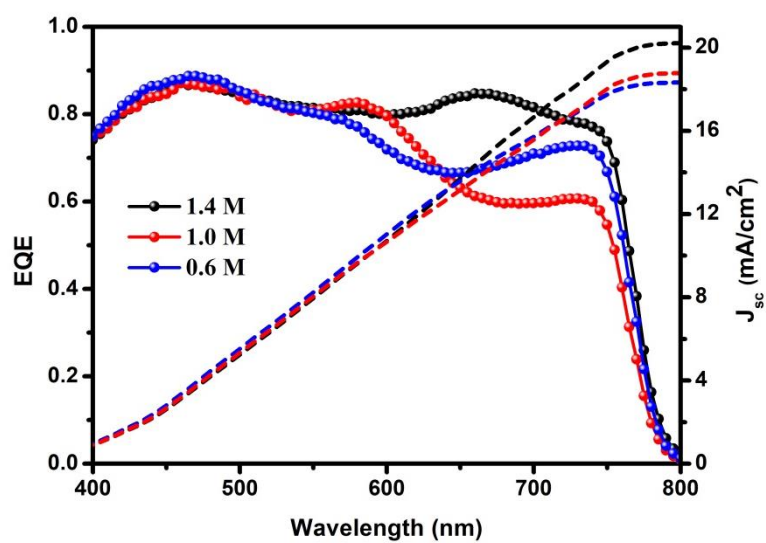

**Figure S4.** EQE spectra and their corresponding integrated photocurrents (dashed lines) of

inverted PSCs with different concentration (1.4 M, 1.0 M and 0.6 M) of perovskite precursors.

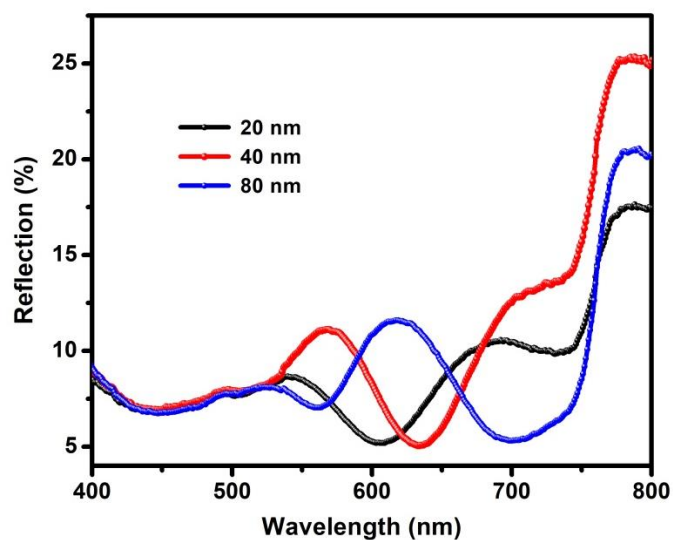

**Figure S5.** Reflection spectra of 1 M device with different thicknesses of C<sub>60</sub> ETL.

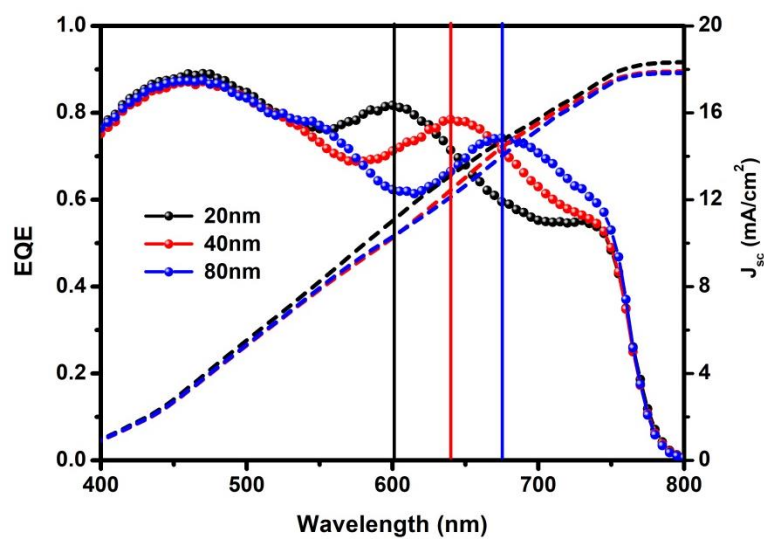

**Figure S6.** EQE spectra and their corresponding integrated photocurrents (dashed lines) of 1 M device with different thickness (20 nm, 40 nm, 80 nm) of C<sub>60</sub> ETL.

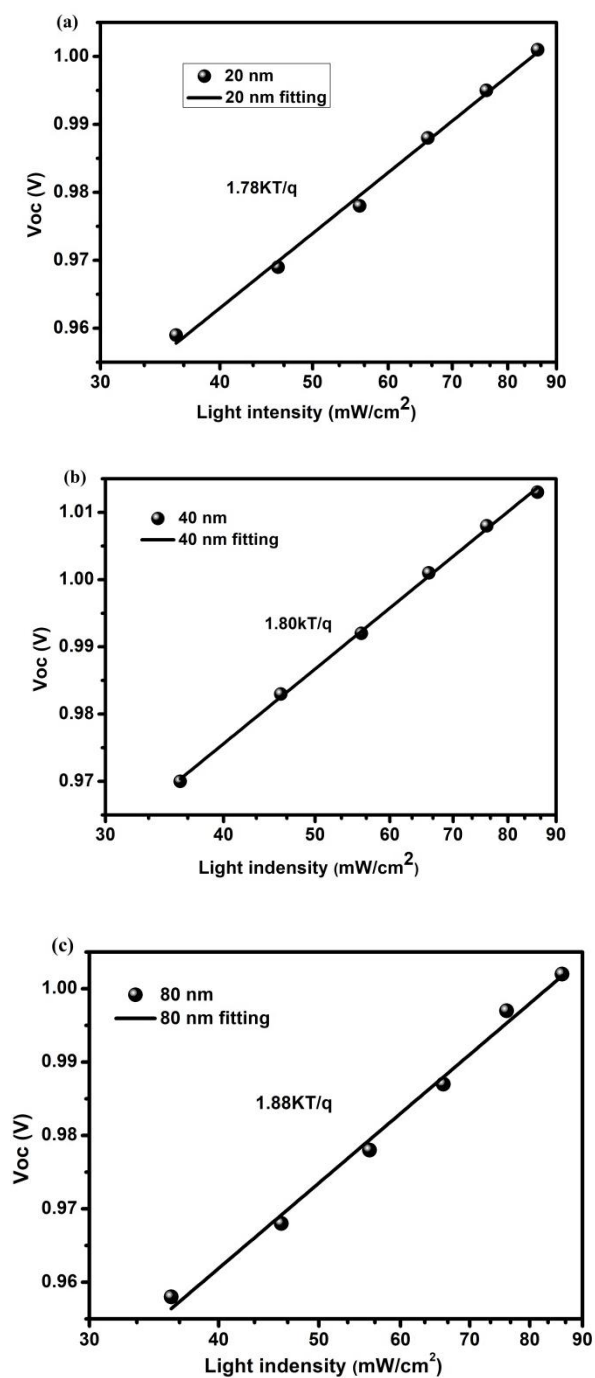

**Figure S7.**  $V_{oc}$  vs. light intensity for the PSCs with different thickness (a) 20 nm, (b) 40 nm, (c) 80 nm of  $C_{60}$  ETL

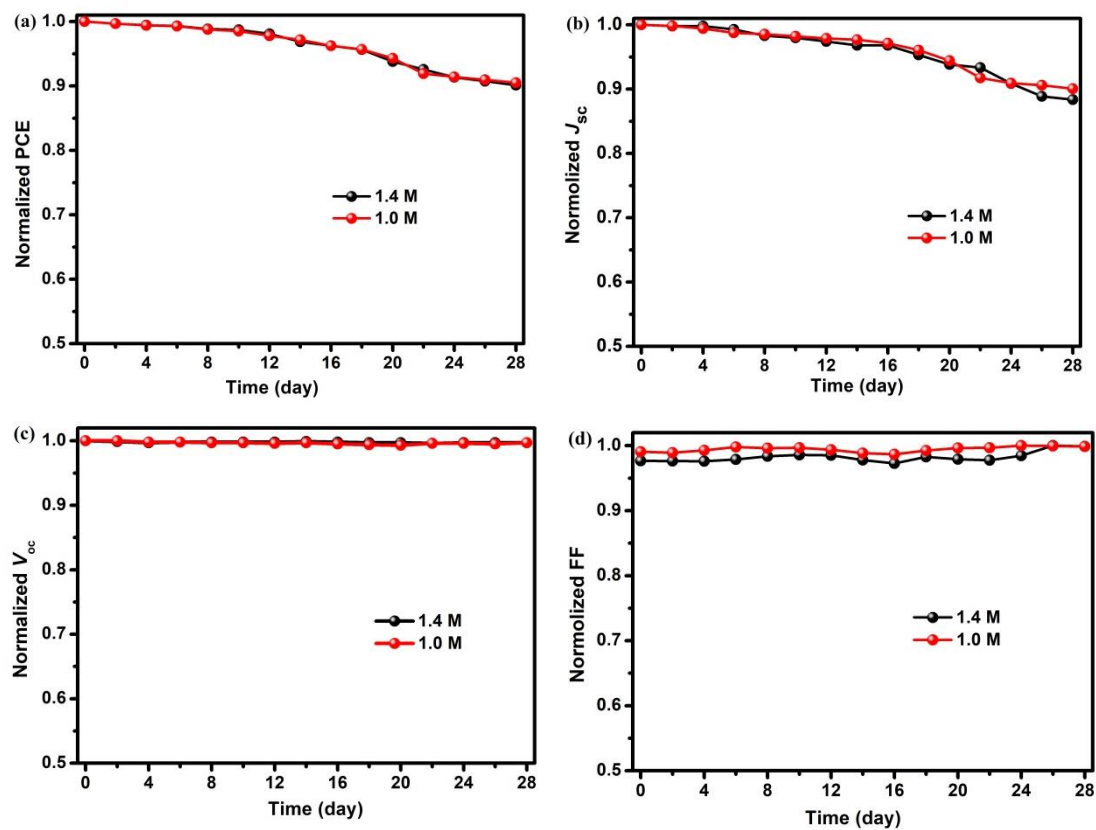

**Figure S8.** The normalized stability results displayed in Figure 4:(a) PCE, (b)  $J_{sc}$ , (c)  $V_{oc}$  and (d) FF.

**Table S1:** The photovoltaic parameters of 1 M device with three different thickness of  $C_{60}$  ETL.

| Thickness $C_{60}$ | $V_{oc}$ (V) | $J_{sc}$ (mA/cm <sup>2</sup> ) | FF (%) | PCE (%) |
|--------------------|--------------|--------------------------------|--------|---------|
| 20 nm              | 1.030        | 18.53                          | 81.2   | 15.50   |
| 40 nm              | 1.030        | 18.25                          | 80.4   | 15.11   |
| 80 nm              | 1.028        | 17.30                          | 80.6   | 14.33   |

**Table S2:** Parameters of equivalent circuit extracted from the fitting of impedance data for ITO/PEDOT:PSS/Perovskite/C<sub>60</sub>/BCP/Ag device with different thicknesses of C<sub>60</sub> (20, 40, 80 nm) under the illumination of AM 1.5G, 100 mW/cm<sup>2</sup>.

| Thickness C <sub>60</sub> | <i>R<sub>s</sub></i> ( $\Omega$ ) | <i>R<sub>ct</sub></i> ( $\Omega$ ) | <i>R<sub>rec</sub></i> ( $\Omega$ ) |
|---------------------------|-----------------------------------|------------------------------------|-------------------------------------|
| <b>20 nm</b>              | 35.3                              | 337                                | 869                                 |
| <b>40 nm</b>              | 35.8                              | 352                                | 373                                 |
| <b>80 nm</b>              | 43.7                              | 372                                | 367                                 |
